# Supplementary material
Source: PubMed Central journal article supplement (PMC3181380)

Figure S4

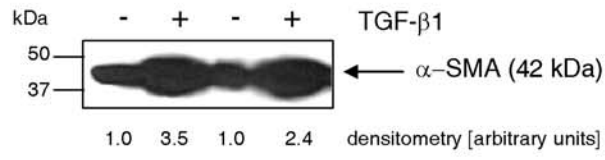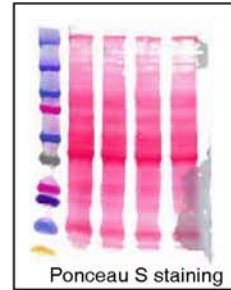

Supplement: mmc4.pdf [file mmc4.pdf]
